# Supplementary material
Source: publisher figshare collection journal article supplement (https://acs.figshare.com/ndownloader/files/17804660)
Supplement: Supplementary file 1 [file 17804660]

## **(+/-)-Lucidumone, a COX-2 Inhibitory Caged Fungal Meroterpenoid from *Ganoderma lucidum***

Yong-Ming Yan,<sup>†,#</sup> Hao-Xing Zhang,<sup>†,#</sup> Huan Liu,<sup>†,#</sup> Yan Wang,<sup>‡</sup> Jing-Bo Wu,<sup>†</sup> Yan-Peng Li,<sup>†</sup> and Yong-Xian Cheng<sup>\*,†</sup>

<sup>†</sup> School of Pharmaceutical Sciences, Health Science Center, College of Life Sciences and Oceanography, Shenzhen University, Shenzhen 518060, PR China

<sup>‡</sup> Center for Translation Medicine Research and Development, Shenzhen Institute of Advanced Technology, Chinese Academy of Sciences, Shenzhen 518055, PR China

## Contents of Supporting Information

---

**Table S1.**  $^1\text{H}$  (600 MHz) and  $^{13}\text{C}$  NMR (150 MHz) Data of **1** in  $\text{DMSO-}d_6$  ( $\delta$  in ppm,  $J$  in Hz).

**Figure S1.**  $^1\text{H}$  NMR spectrum of **1** in methanol- $d_4$ .

**Figure S2.**  $^{13}\text{C}$  NMR and DEPT spectra of **1** in methanol- $d_4$ .

**Figure S3.**  $^1\text{H}$ - $^1\text{H}$  COSY spectrum of **1** in methanol- $d_4$ .

**Figure S4.** HSQC spectrum of **1** in methanol- $d_4$ .

**Figure S5.** HMBC spectrum of **1** in methanol- $d_4$ .

**Figure S6.** ROESY spectrum of **1** in methanol- $d_4$ .

**Figure S7.** MS and HRESIMS of **1**.

**Figure S8.**  $^1\text{H}$  NMR spectrum of **1** in  $\text{DMSO-}d_6$ .

**Figure S9.**  $^{13}\text{C}$  NMR spectrum of **1** in  $\text{DMSO-}d_6$ .

**Figure S10.** HMBC spectrum of **1** in  $\text{DMSO-}d_6$ .

**Figure S11.** Partial HMBC spectrum of **1** in  $\text{DMSO-}d_6$ .

**Figure S12.** Partial HMBC spectrum of **1** in  $\text{DMSO-}d_6$ .

**Figure S13.** ROESY spectrum of **1** in  $\text{DMSO-}d_6$ .

**Figure S14.** CD spectrum of (+)-**1** in methanol.

**Figure S15.** CD spectrum of (–)-**1** in methanol.

**Figure S16.** HPLC analysis of compound **1** for purity examination.

**Figure S17.** Chiral HPLC separation of compound **1**.

**Figure S18.** HPLC analysis of compound (–)-**1** for purity examination.

**Figure S19.** Research topic about ‘COX-2’ from PubMed during 1992–2019.

**Figure S20.** The  $\text{IC}_{50}$  value of celecoxib toward recombinant COX-2.

**Figure S21.** Docking model validation.

**Figure S22.** Molecular docking analysis of (+)-**1**.

Detailed isolation procedures.

X-ray crystallographic data of (–)-**1**.

Biological assays.

Docking study

---

**Table S1.** <sup>1</sup>H (600 MHz) and <sup>13</sup>C NMR (150 MHz) Data of **1** in DMSO-*d*<sub>6</sub> ( $\delta$  in ppm, *J* in Hz).

| No  | $\delta_{\text{H}}$                      | $\delta_{\text{C}}$ | HMBC (H $\rightarrow$ C)             | ROESY               |
|-----|------------------------------------------|---------------------|--------------------------------------|---------------------|
| 1   |                                          | 148.3               |                                      |                     |
| 2   |                                          | 125.2               |                                      |                     |
| 3   |                                          | 135.2               |                                      |                     |
| 4   |                                          | 147.7               |                                      |                     |
| 5   | 6.97 d (8.6)                             | 124.9               | C-1, C-3, C-7'                       |                     |
| 6   | 6.71 d (8.6)                             | 118.1               | C-2, C-4                             |                     |
| 1'  |                                          | 201.0               |                                      |                     |
| 2'  | 2.70 d (2.2)                             | 61.2                | C-1', C-3', C-4', C-7', C-9', C-11'  | H-4', H-12', Hb-10' |
| 3'  |                                          | 51.3                |                                      |                     |
| 4'  | 3.75 brs                                 | 77.6                |                                      | H-2', H-12', Hb-10' |
| 5'  | 2.24 t-like (4.5)                        | 47.8                |                                      | H-6'                |
| 6'  | 2.55 q-like (3.5)                        | 37.5                | C-3, C-2', C-4', C-7'                | H-5', Ha-10'        |
| 7'  |                                          | 85.3                |                                      |                     |
| 8'  | Ha 1.71 m<br>Hb 0.86 m                   | 15.5                |                                      |                     |
| 9'  | Ha 1.99 m<br>Hb 1.08 m                   | 14.8                |                                      |                     |
| 10' | Ha 4.05 dd (8.1, 4.8)<br>Hb 3.64 d (8.1) | 72.8                | C-4', C-5', C-7'<br>C-4', C-5', C-7' | H-5', H-6'<br>H-4'  |
| 11' |                                          | 211.5               |                                      |                     |
| 12' | 2.16 s                                   | 28.1                | C-3', C-11'                          | H-2', H-4'          |

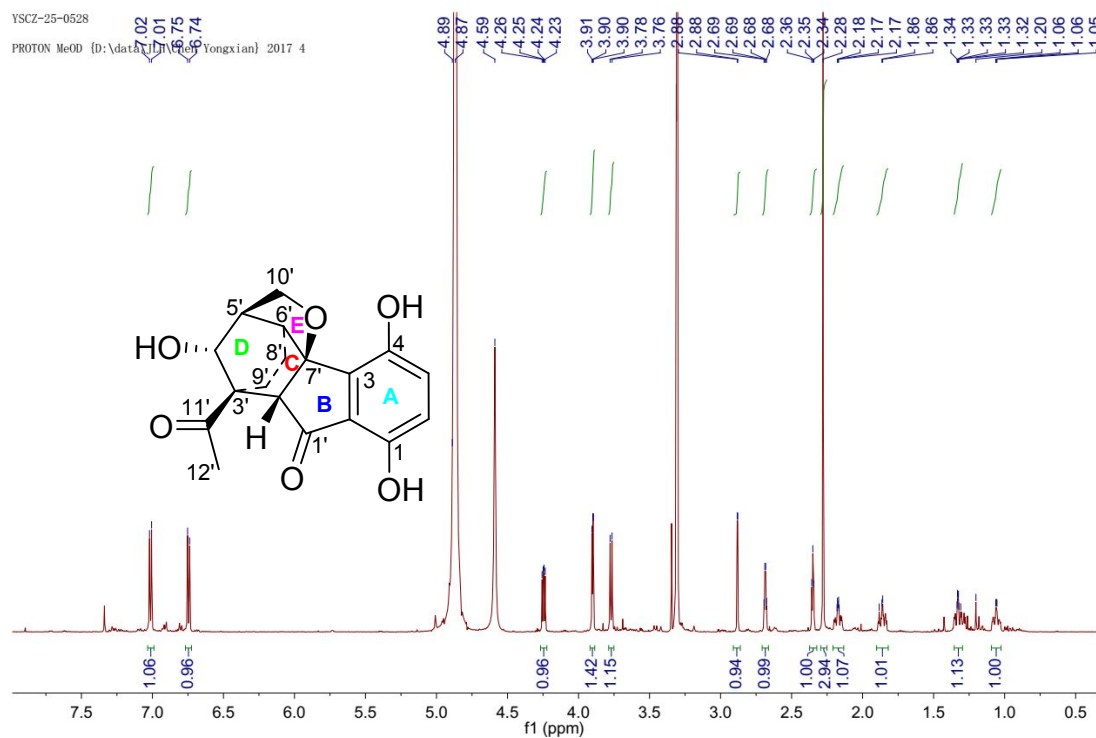

**Figure S1.**  $^1\text{H}$  NMR spectrum of **1** in methanol- $d_4$ .

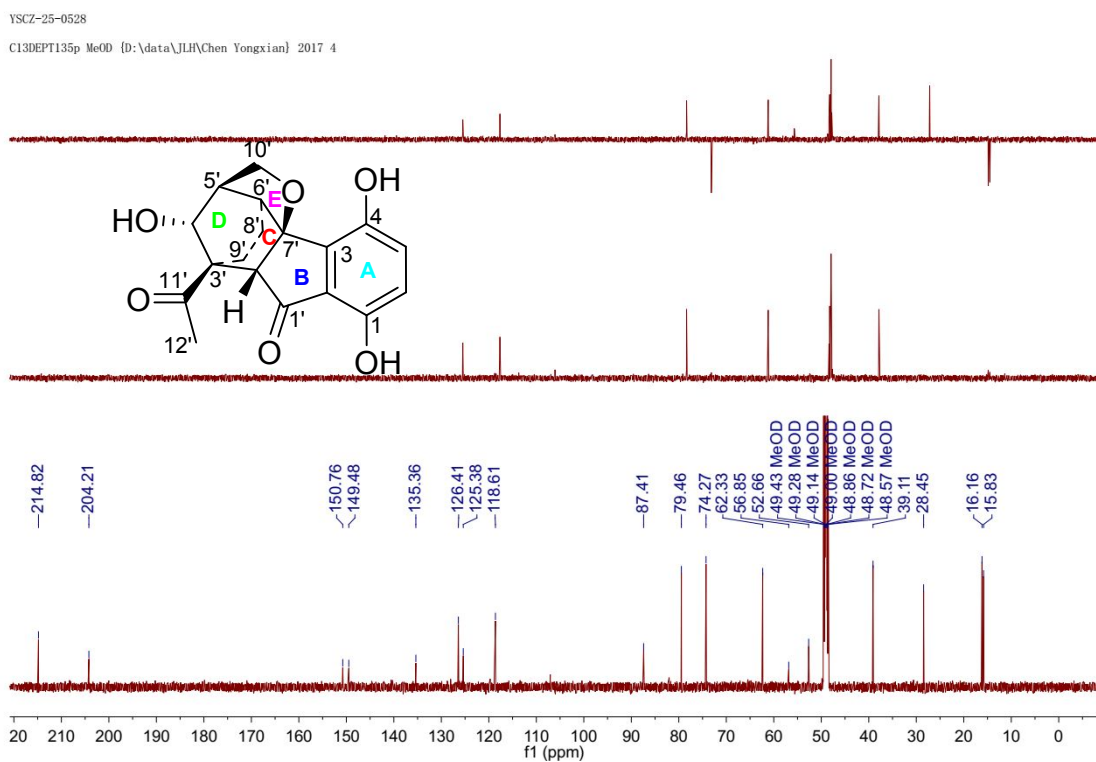

**Figure S2.**  $^{13}\text{C}$  NMR and DEPT spectra of **1** in methanol- $d_4$ .

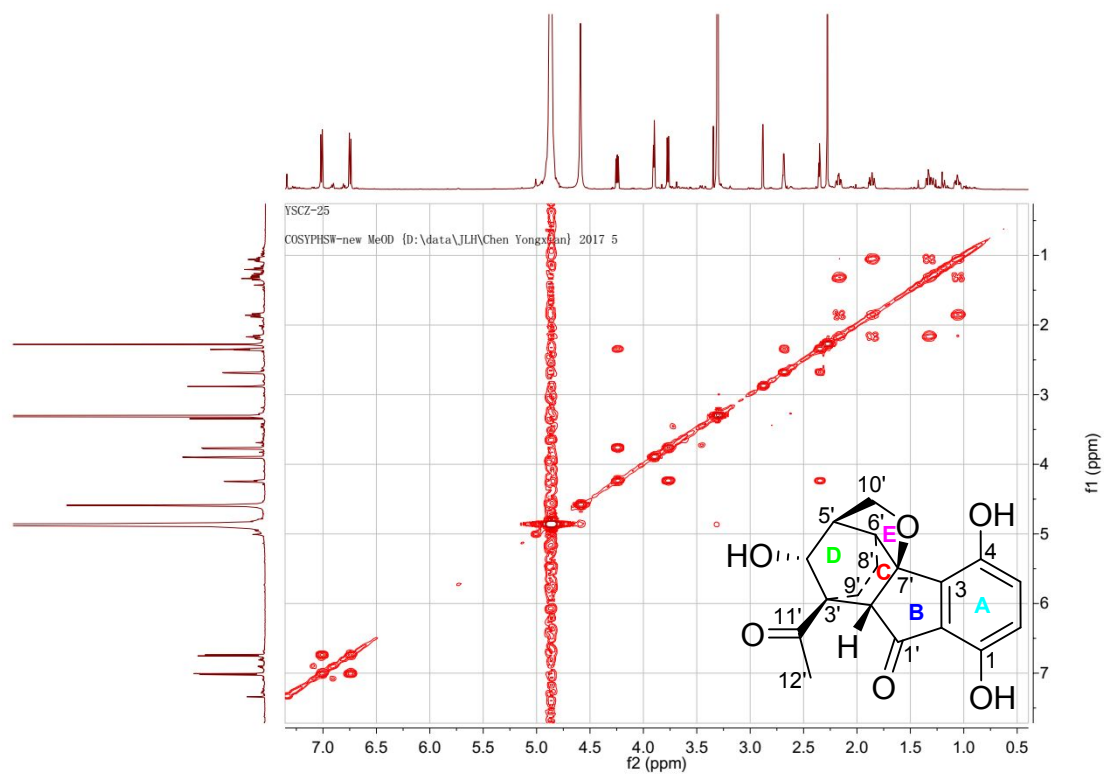

**Figure S3.**  $^1\text{H}$ - $^1\text{H}$  COSY spectrum of **1** in methanol- $d_4$ .

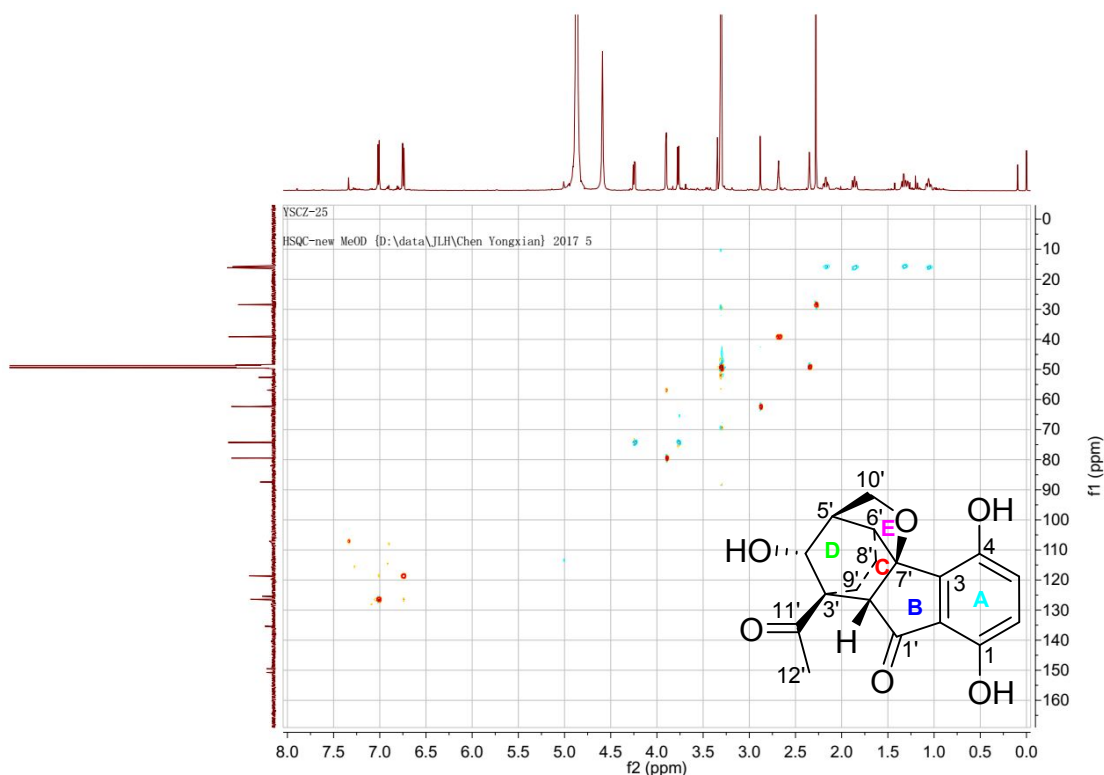

**Figure S4.** HSQC spectrum of **1** in methanol- $d_4$ .

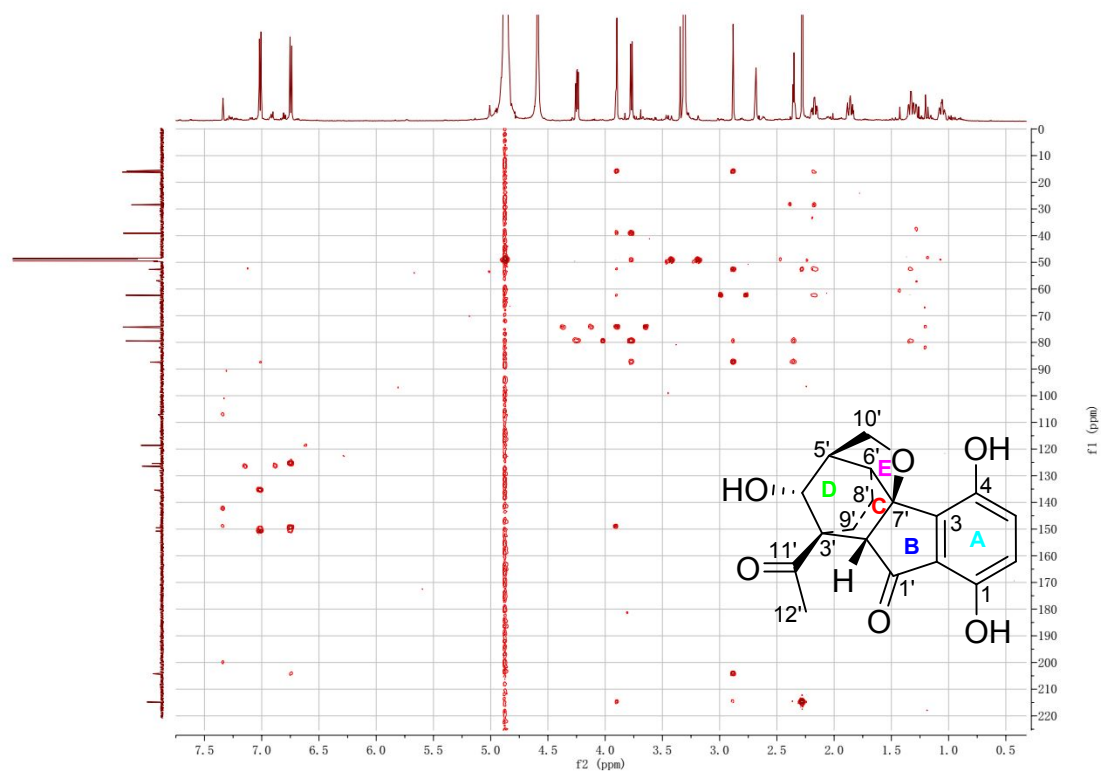

**Figure S5.** HMBC spectrum of **1** in methanol- $d_4$ .

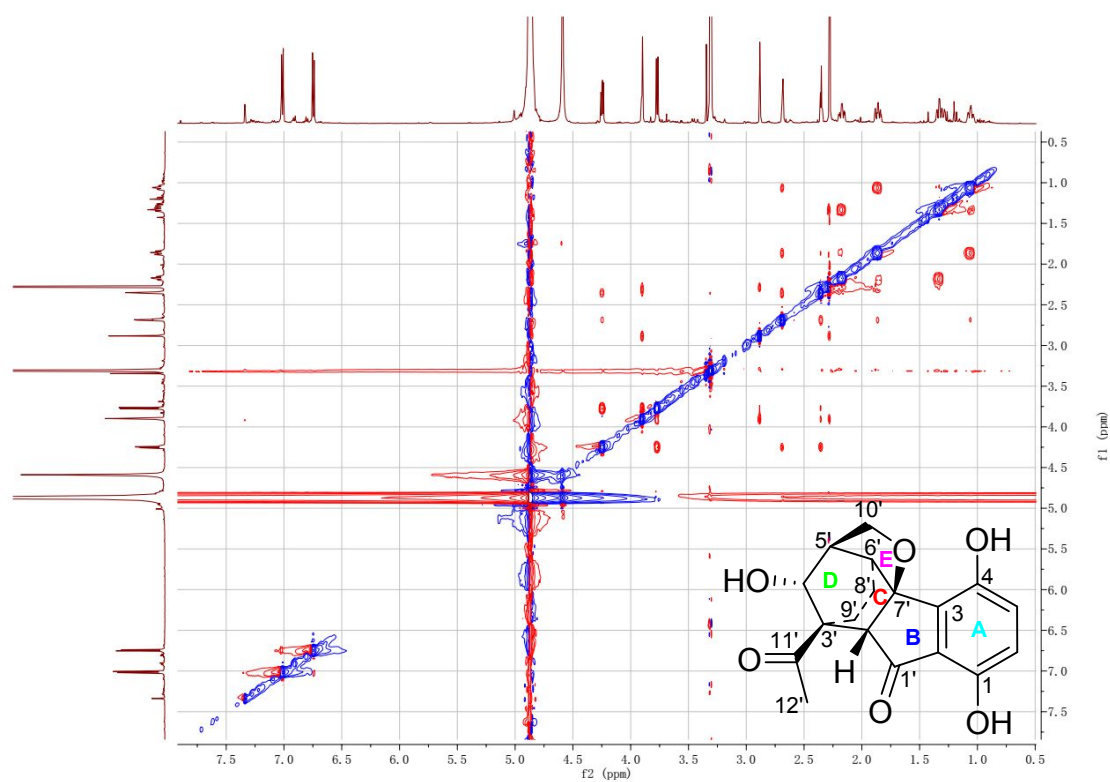

**Figure S6.** ROESY spectrum of **1** in methanol- $d_4$ .

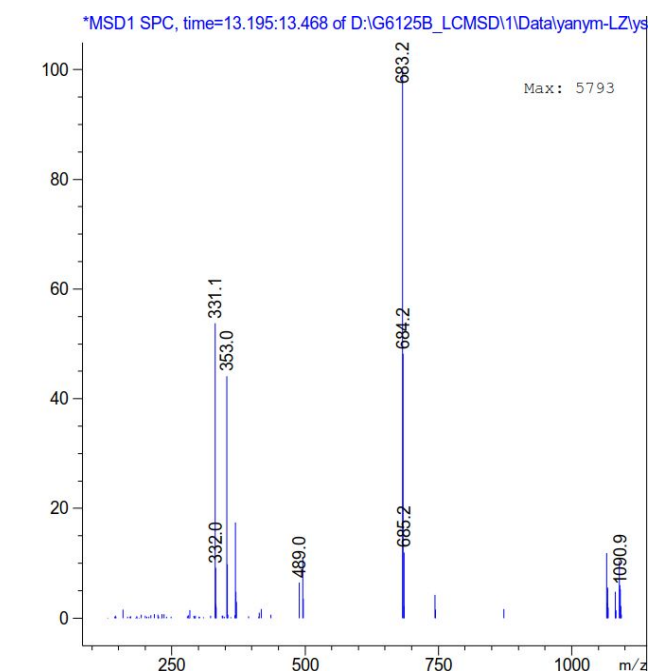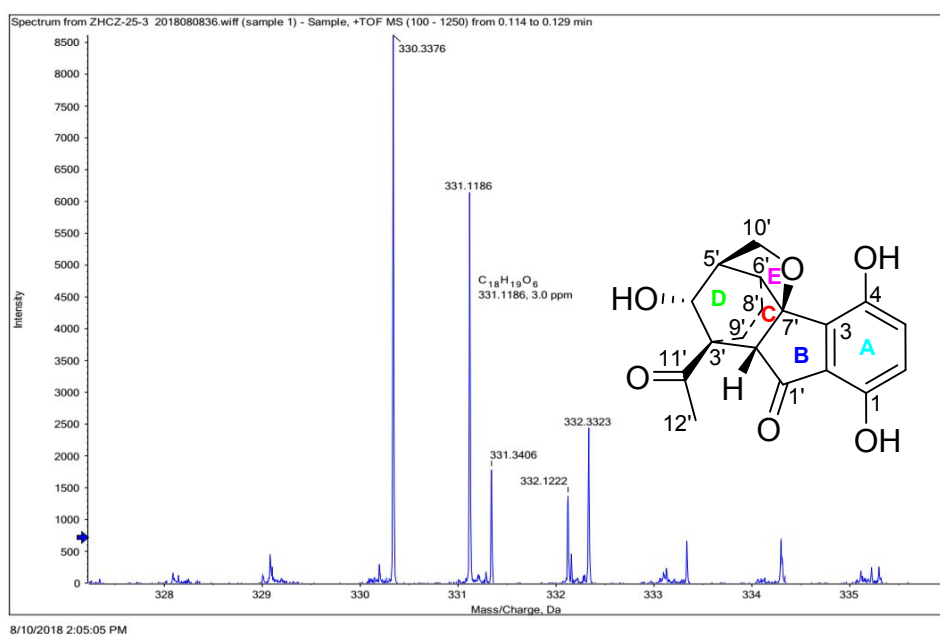

| Hit | Formula           | $m/z$    | RDB  | ppm |
|-----|-------------------|----------|------|-----|
| 1   | $C_{18}H_{19}O_6$ | 331.1176 | 10.0 | 3.0 |

**Figure S7.** MS and HRESIMS of **1**.

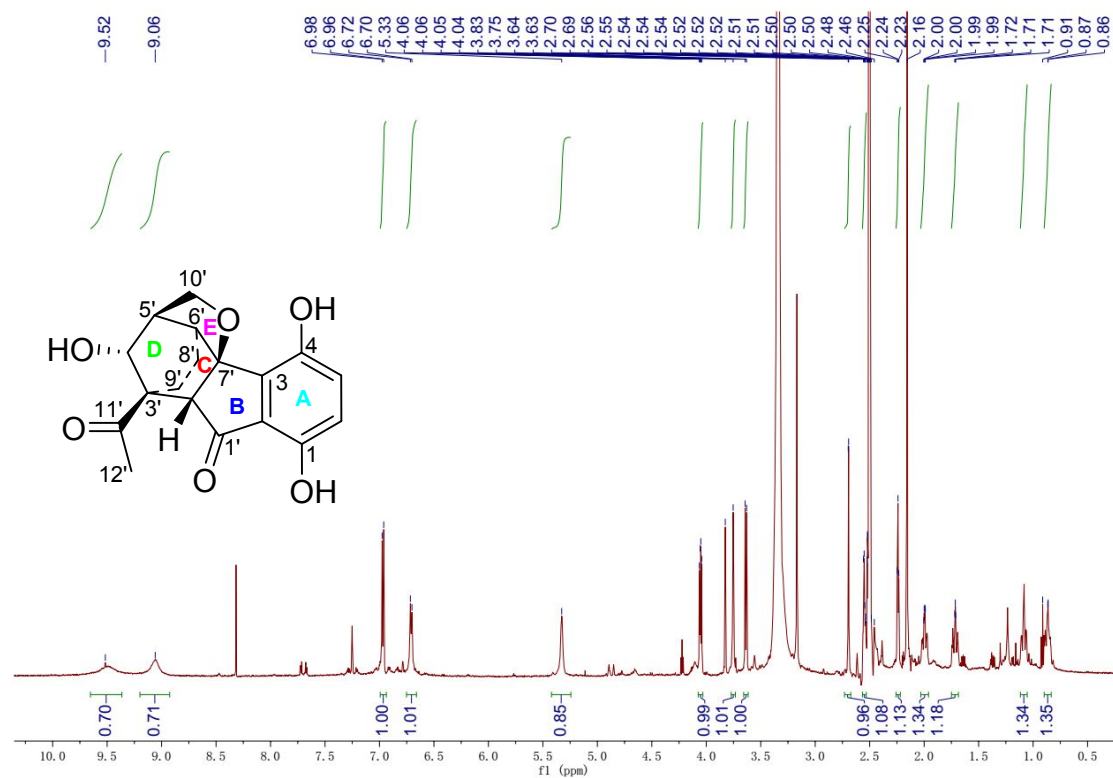

**Figure S8.** <sup>1</sup>H NMR spectrum of **1** in DMSO-*d*<sub>6</sub>.

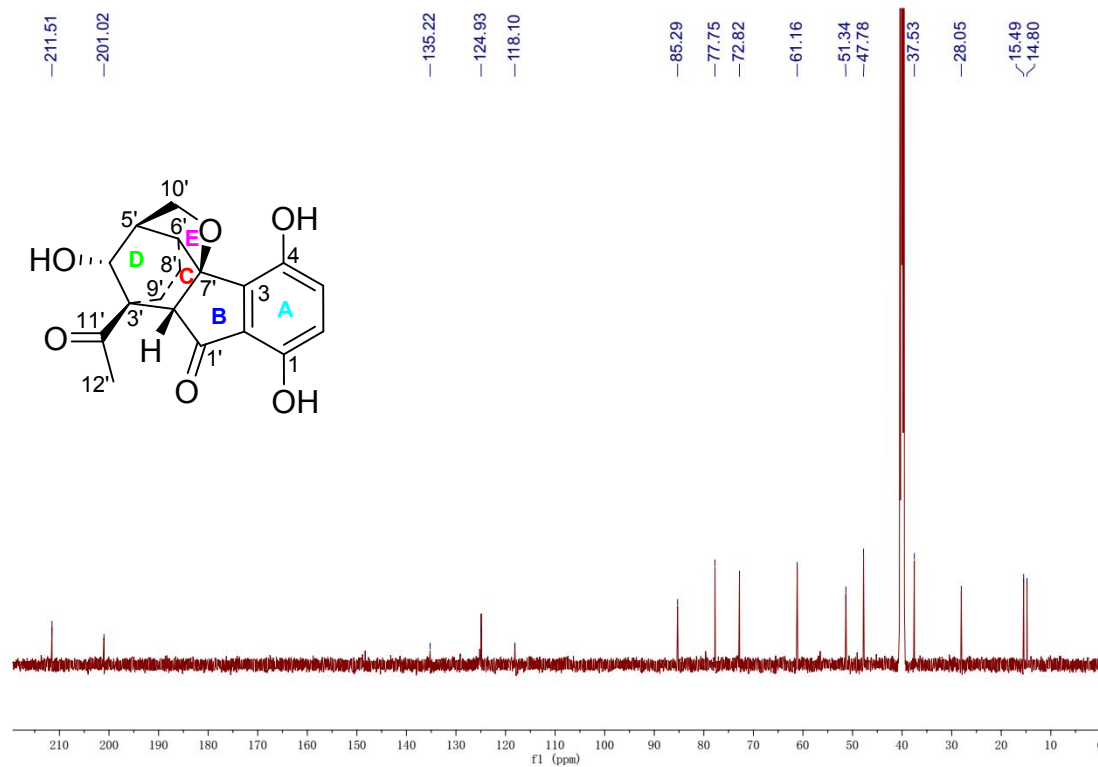

**Figure S9.** <sup>13</sup>C NMR spectrum of **1** in DMSO-*d*<sub>6</sub>.



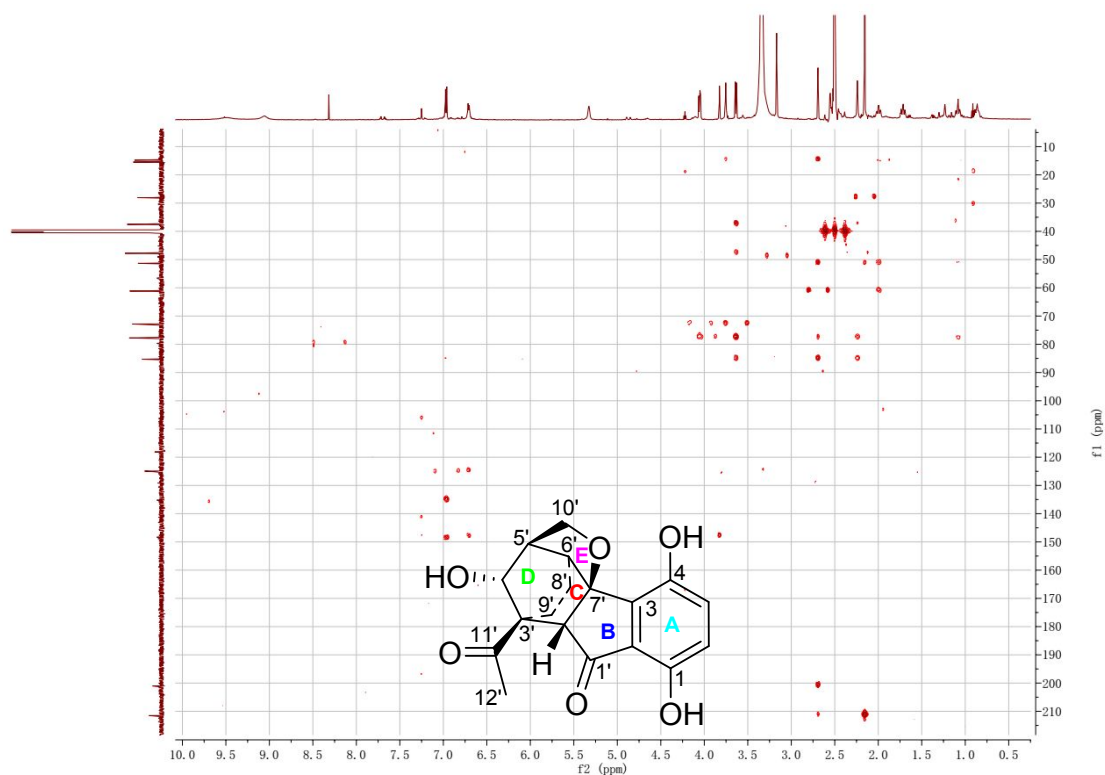

**Figure S10.** HMBC spectrum of **1** in DMSO- $d_6$ .

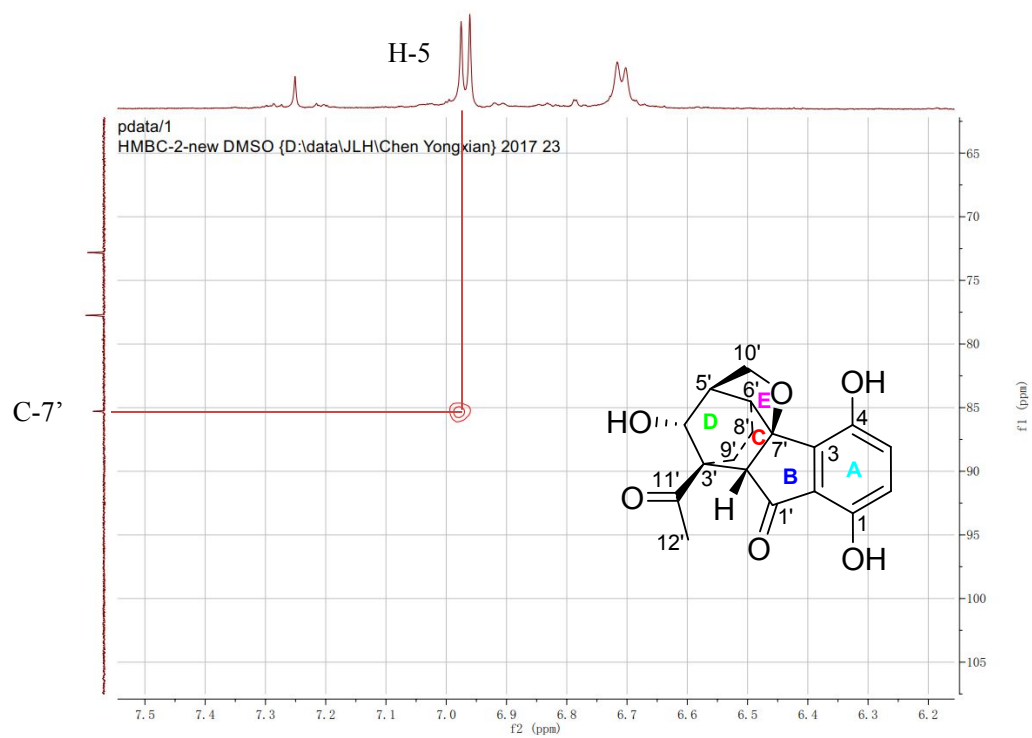

**Figure S11.** Partial HMBC spectrum of **1** in DMSO- $d_6$ .

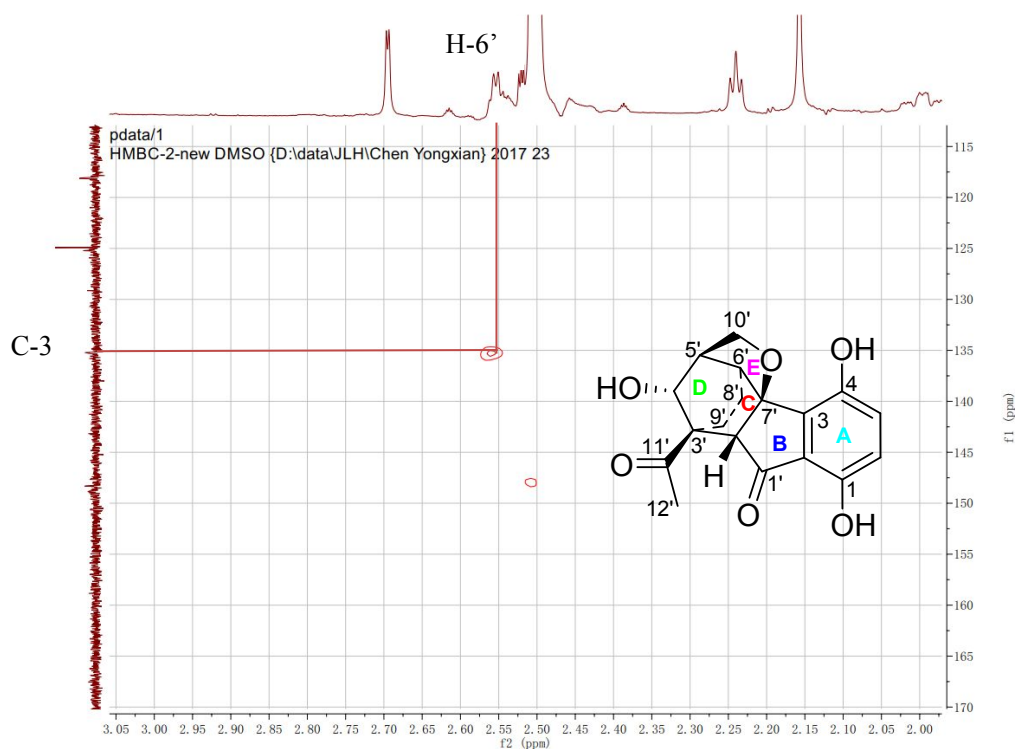

**Figure S12.** Partial HMBC spectrum of **1** in DMSO- $d_6$ .

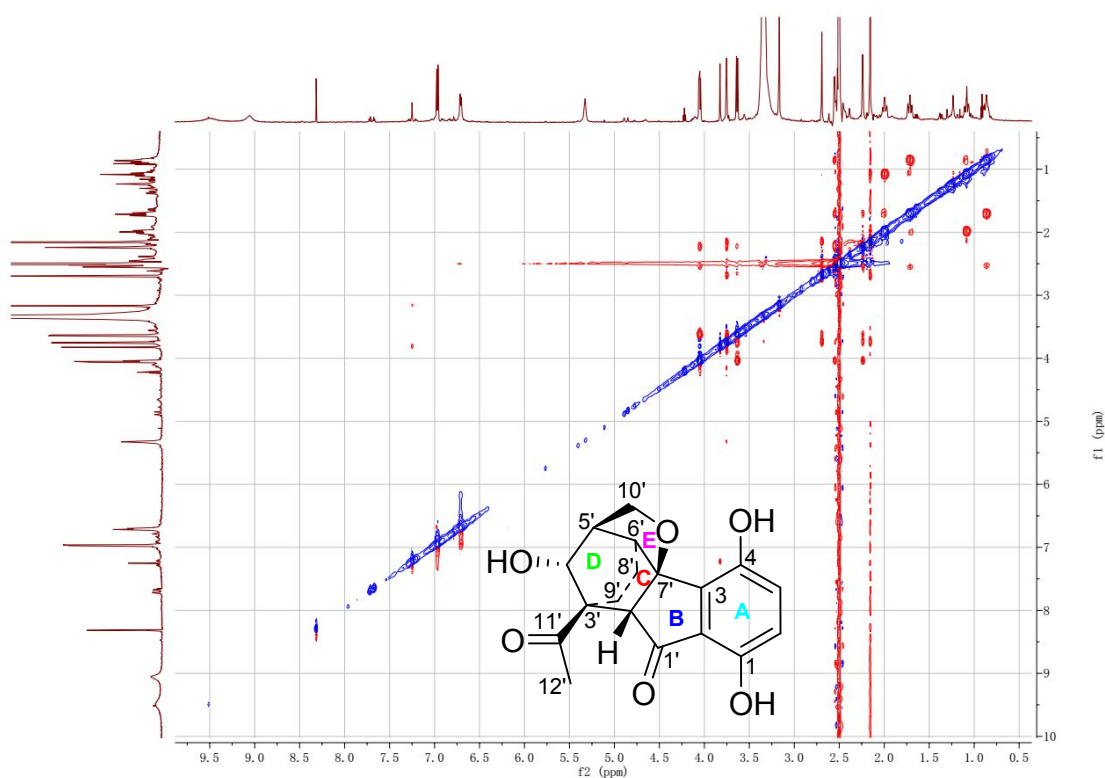

**Figure S13.** ROESY spectrum of **1** in DMSO- $d_6$ .

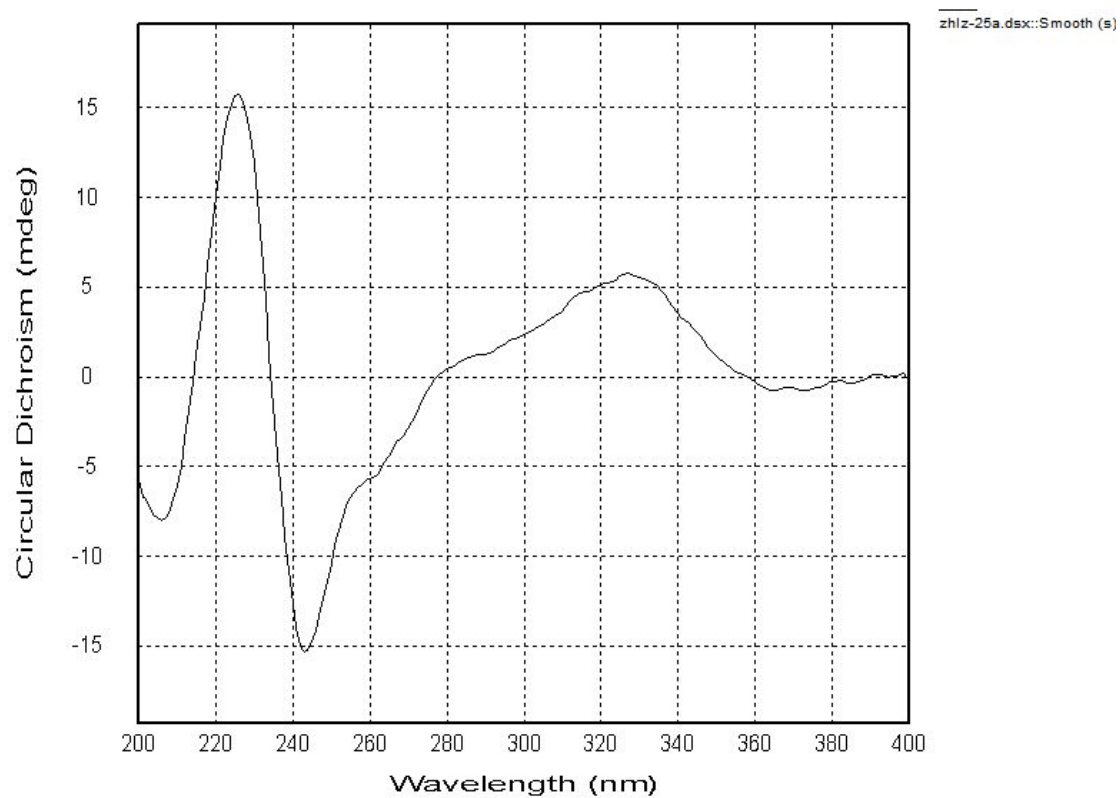

**Figure S14.** CD spectrum of (+)-**1** in MeOH.

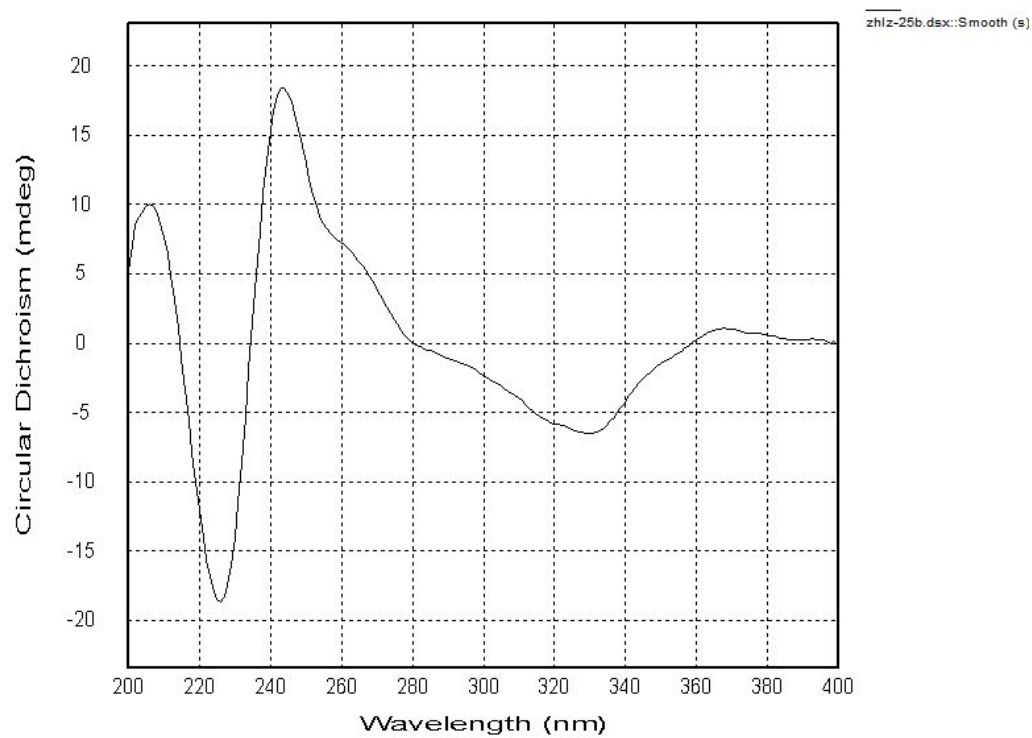

**Figure S15.** CD spectrum of (-)-**1** in MeOH.

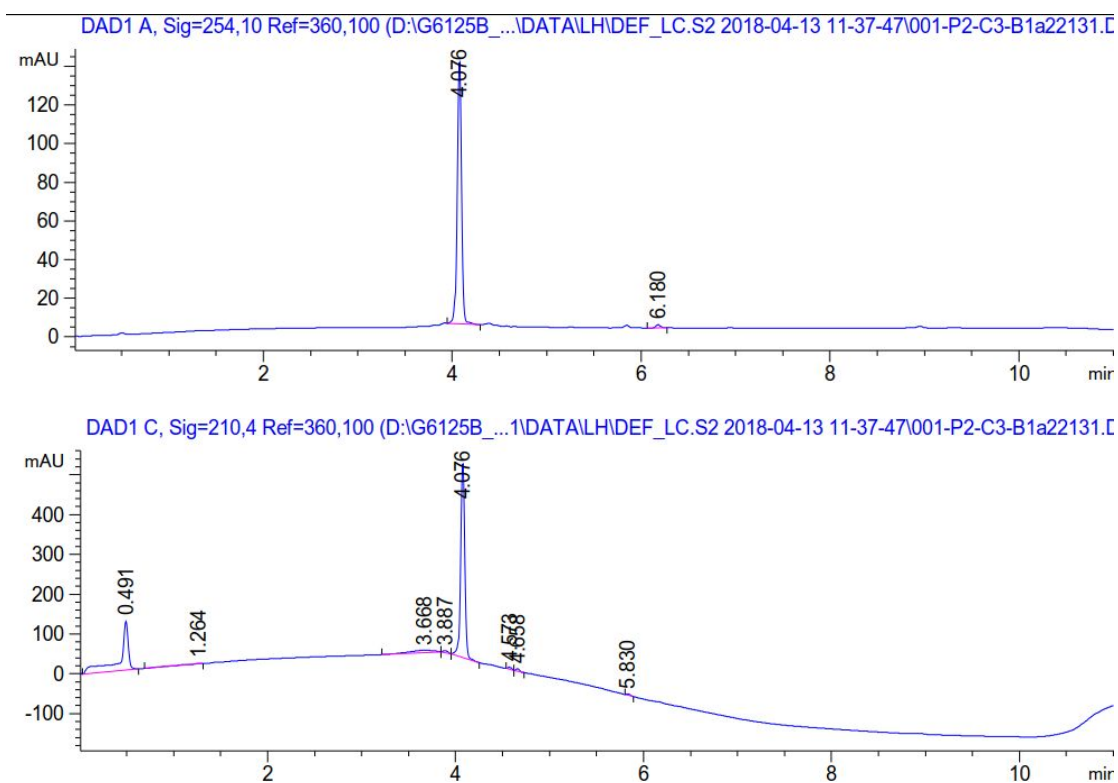

**Figure S16.** HPLC analysis of compound **1** (Acetonitrile/H<sub>2</sub>O (CF<sub>3</sub>COOH, 0.05%), 0-5 min, 10%-100%, 5-10 min, 100%; T=30 °C; flow rate: 0.3 mL/min).

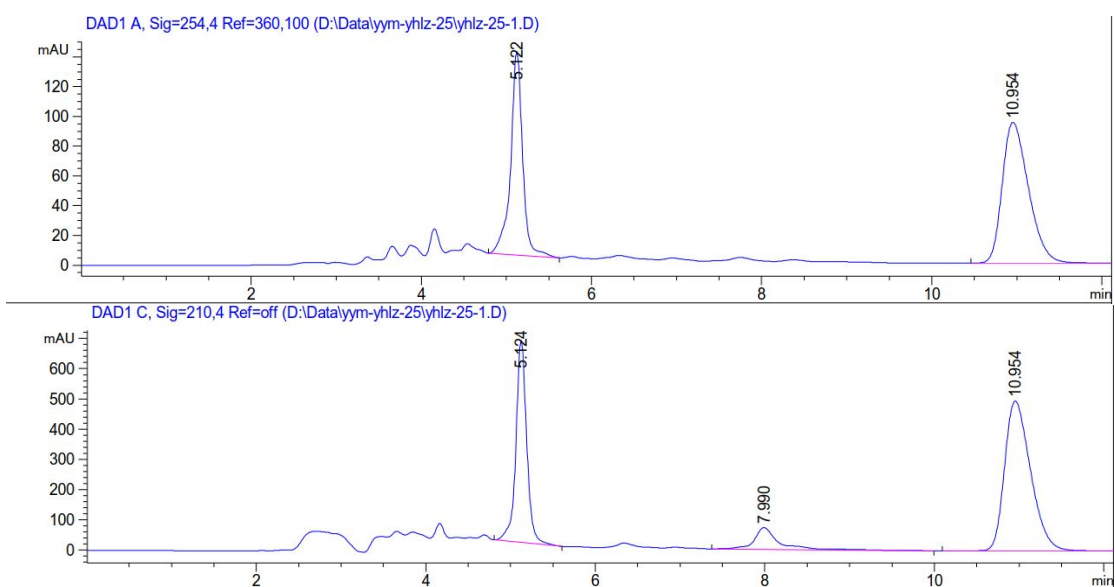

**Figure S17.** Chiral HPLC separation of racemic **1** (*n*-hexane/isopropanol, 68:32; T=30 °C; flow rate: 1.0 mL/min; wavelength: 210 nm and 254 nm).

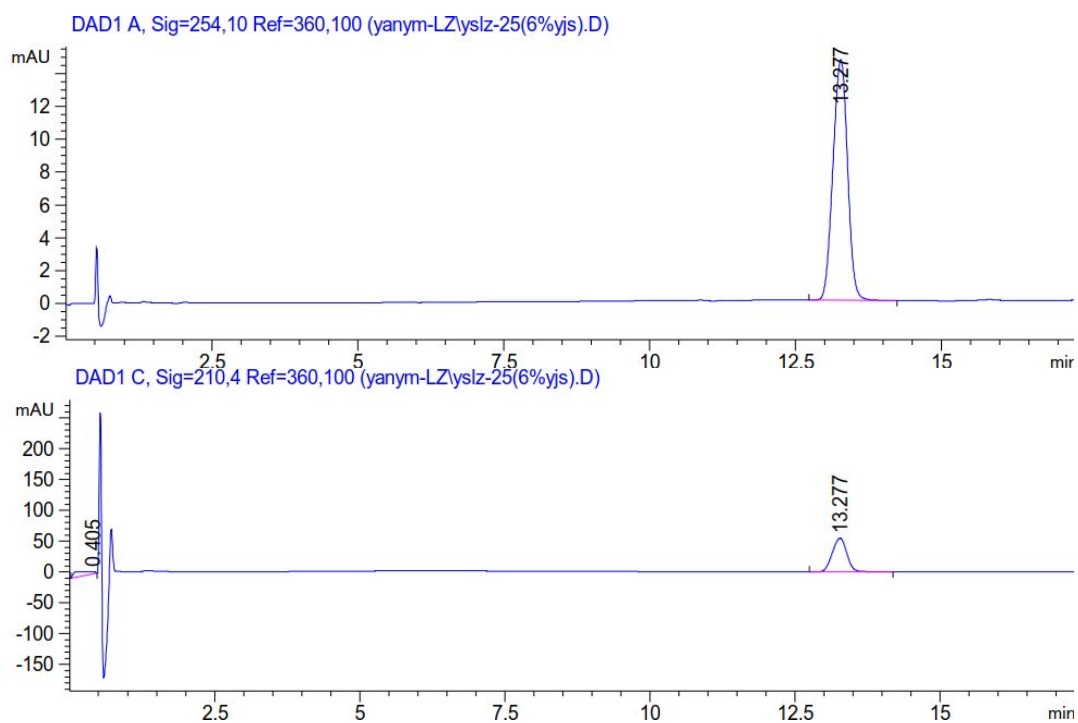

**Figure S18.** HPLC analysis of compound (-)-**1** for purity examination (Acetonitrile/H<sub>2</sub>O (CF<sub>3</sub>COOH, 0.05%), 6:94; T=30 °C; flow rate: 0.3 mL/min; wavelength: 210 nm and 254 nm).

pubmed - "Cyclooxygenase 2"

| year | count |
|------|-------|
| 1992 | 4     |
| 1993 | 8     |
| 1994 | 30    |
| 1995 | 49    |
| 1996 | 140   |
| 1997 | 322   |
| 1998 | 406   |
| 1999 | 661   |
| 2000 | 833   |
| 2001 | 1082  |
| 2002 | 1366  |
| 2003 | 1473  |
| 2004 | 1698  |
| 2005 | 1802  |
| 2006 | 1982  |
| 2007 | 1871  |
| 2008 | 1703  |
| 2009 | 1756  |
| 2010 | 1789  |
| 2011 | 1755  |
| 2012 | 1785  |
| 2013 | 1831  |
| 2014 | 1807  |
| 2015 | 1714  |
| 2016 | 1621  |
| 2017 | 1569  |
| 2018 | 1491  |
| 2019 | 824   |

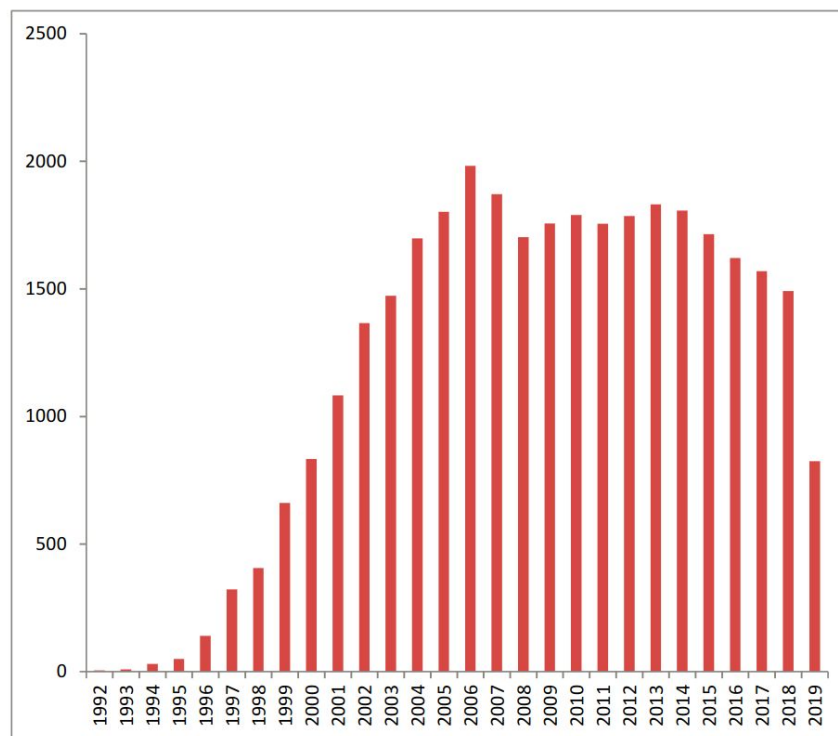

**Figure S19.** Research topic about 'COX-2' from PubMed during 1992–2019.

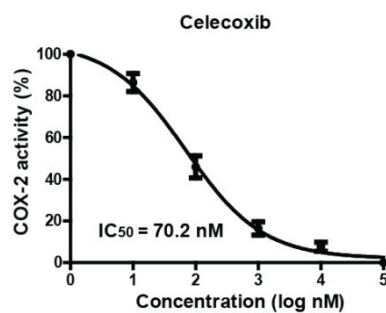

**Figure S20.** The  $IC_{50}$  value of celecoxib toward recombinant COX-2 was determined by plotting and analyzing the inhibition curve data using Graph Pad Prism 5 software (Mountain View, CA).

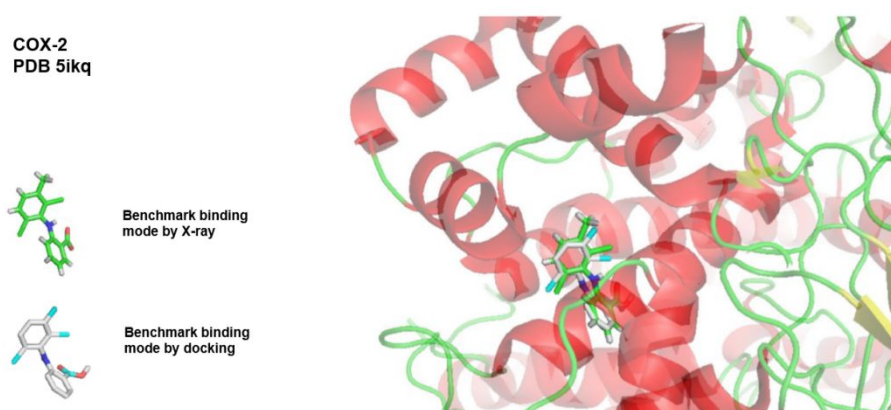

**Figure S21.** Molecular docking analysis illustrates the favorable binding positions of benchmark (meclofenamic acid) with lowest binding free energy in the catalytic site of human COX-2 (PDB code 5IKQ). The three-dimensional diagram shows the interactions of benchmark (green stick: experimental conformation; gray stick: predicted conformation) to human COX-2 (colored cartoon).

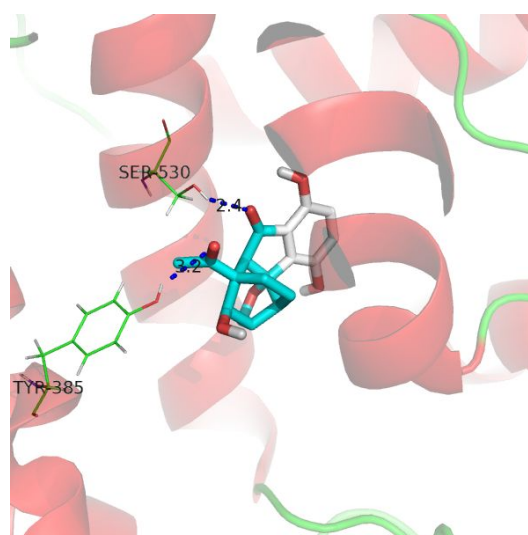

**Figure S22.** Molecular docking analysis illustrates the favorable binding positions of (+)-1 with lowest binding free energy in the catalytic site of human COX-2 (PDB code 5IKQ). The three-dimensional diagram shows the interactions of (+)-1 (cyan stick) to human COX-2 (red cartoon) with labeled residues (green line).

## Detailed isolation procedures

### 1. General experimental procedures

Optical rotations were measured on a Bellingham + Stanley ADP 440 + digital polarimeter. UV spectrum was obtained on a Shimadzu UV-2600 spectrometer. CD spectra were recorded on a Chirascan instrument. NMR spectra were measured on a Bruker AV-600 spectrometer, with TMS as an internal standard. ESIMS was

collected on an Agilent G6125B LC/MSD spectrometer. HRESIMS was collected by a Shimadzu LC-20AD AB SCIEX triple TOF 5600+ MS spectrometer. Silica gel (200–300 mesh; Qingdao Marine Chemical Inc., PR China), C-18 silica gel (40–60  $\mu\text{m}$ ; Daiso Co., Japan), MCI gel CHP 20P (75–150  $\mu\text{m}$ , Mitsubishi Chemical Industries, Tokyo, Japan), and Sephadex LH-20 (Amersham Pharmacia, Sweden) were used for column chromatography. Semi-preparative HPLC equipment was a SEP LC-52 with a MWD UV detector (Separation Technology Co. Ltd., Beijing, PR China) equipped with an Agilent Zorbax SB-C<sub>18</sub> column (250 mm  $\times$  9.4 mm, i.d., 5  $\mu\text{m}$ ). Chiral separation was carried out using an Agilent 1260 liquid chromatograph equipped with a Daicel Chiralpak AD-H column (250 mm  $\times$  4.6 mm, i.d., 5  $\mu\text{m}$ ).

## 2. Fungal material

The fruiting bodies of *G. lucidum* cultivated in Yongsheng County of Yunnan Province were purchased from Tongkang Pharmaceutical Co. Ltd. in Guangzhou Province, PR China, in December 2017. The material was identified by Prof. Zhu-Liang Yang at Kunming Institute of Botany, Chinese Academy of Sciences, PR China, and a voucher specimen (CHYX-0609) was deposited at School of Pharmaceutical Sciences, Shenzhen University Health Science Center, PR China.

## 3. Extraction and isolation

The fruiting bodies of *G. lucidum* (40 kg) were powdered and extracted by diacolation method with 95% EtOH (flow rate: 3 mL/min; 480 L in total) at room temperature. After removal of solvents under reduced pressure, a crude extract (1.7 kg) was obtained, which was suspended in H<sub>2</sub>O and partitioned with EtOAc three times to afford an EtOAc extract (1.3 kg). This extract was subjected to a MCI gel CHP 20P column with gradient aqueous MeOH (40%–100%) to get nine fractions (Fr.A–Fr.I). Fr.B (14.1 g) was submitted to Sephadex LH-20 (MeOH) to yield three fractions (Fr.B.1–Fr.B.3). Fr.B.2 (6.4 g) was submitted to a RP-18 column eluted with aqueous MeOH (30%–100%) to produce seven fractions (Fr.B.2.1–Fr.B.2.7). Among them, Fr.B.2.1 (1.97 g) was gel filtrated on Sephadex LH-20 (MeOH) to afford two fractions (Fr.B.2.1.1–Fr.B.2.1.2). Fr.B.2.1.2 (1.4 g) was isolated by MCI gel CHP 20P column with gradient aqueous MeOH (25%–100%) to get six fractions (Fr.B.2.1.2.1–Fr.B.2.1.2.6). Further purification of Fr.B.2.1.2.2 (420 mg) by Sephadex LH-20



(MeOH) and semi-preparative HPLC eluted with aqueous acetonitrile (15%) afforded compound **1** (1.8 mg,  $t_R$  = 28.1 min, flow rate: 3 mL/min). Compound **1** is a racemate which was submitted to semi-preparative HPLC on a chiral phase (*n*-hexane/isopropanol, 68:32, flow rate: 1.0 mL/min) to afford (+)-**1** (0.4 mg,  $t_R$  = 5.1 min) and (–)-**1** (0.6 mg,  $t_R$  = 10.9 min), respectively.

### X-ray crystallographic data

Crystal data for (–)-**1**:  $C_{18}H_{18}O_6$  ( $M$  = 330.32 g/mol), monoclinic, space group  $P2_1$  (no. 4),  $a$  = 10.1710(3) Å,  $b$  = 7.5398(2) Å,  $c$  = 10.1710(3) Å,  $\beta$  = 110.85°,  $V$  = 728.89(4) Å<sup>3</sup>,  $Z$  = 2,  $T$  = 100.0 K,  $\mu$ (CuK $\alpha$ ) = 0.948 mm<sup>–1</sup>,  $D_{calc}$  = 1.505 g/cm<sup>3</sup>, 11742 reflections measured ( $10.562^\circ \leq 2\theta \leq 136.802^\circ$ ), 2625 unique ( $R_{int}$  = 0.0252,  $R_{sigma}$  = 0.0201) which were used in all calculations. The final  $R_1$  was 0.0251 ( $I > 2\sigma(I)$ ) and  $wR_2$  was 0.0651 (all data).

**Table S2. Crystal data and structure refinement for (–)-**1**.**

|                                               |                                                                  |
|-----------------------------------------------|------------------------------------------------------------------|
| Identification code                           | cxy0429 [(–)- <b>1</b> ]                                         |
| Empirical formula                             | $C_{18}H_{18}O_6$                                                |
| Formula weight                                | 330.32                                                           |
| Temperature/K                                 | 100.0                                                            |
| Crystal system                                | monoclinic                                                       |
| Space group                                   | $P2_1$                                                           |
| $a/\text{\AA}$                                | 10.1710(3)                                                       |
| $b/\text{\AA}$                                | 7.5398(2)                                                        |
| $c/\text{\AA}$                                | 10.1710(3)                                                       |
| $\alpha/^\circ$                               | 90                                                               |
| $\beta/^\circ$                                | 110.85                                                           |
| $\gamma/^\circ$                               | 90                                                               |
| Volume/Å <sup>3</sup>                         | 728.89(4)                                                        |
| $Z$                                           | 2                                                                |
| $\rho_{calc}/\text{g/cm}^3$                   | 1.505                                                            |
| $\mu/\text{mm}^{-1}$                          | 0.948                                                            |
| $F(000)$                                      | 348.0                                                            |
| Crystal size/mm <sup>3</sup>                  | $0.30 \times 0.30 \times 0.18$                                   |
| Radiation                                     | CuK $\alpha$ ( $\lambda$ = 1.54178)                              |
| $2\theta$ range for data collection/ $^\circ$ | 10.562 to 136.802                                                |
| Index ranges                                  | $-12 \leq h \leq 11$ , $-9 \leq k \leq 9$ , $-12 \leq l \leq 12$ |
| Reflections collected                         | 11742                                                            |
| Independent reflections                       | 2625 [ $R_{int}$ = 0.0252, $R_{sigma}$ = 0.0201]                 |
| Data/restraints/parameters                    | 2625/1/222                                                       |
| Goodness-of-fit on $F^2$                      | 1.045                                                            |
| Final R indexes [ $I \geq 2\sigma(I)$ ]       | $R_1$ = 0.0251, $wR_2$ = 0.0649                                  |

Final R indexes [all data]  $R_1 = 0.0254$ ,  $wR_2 = 0.0651$   
Largest diff. peak/hole / e Å<sup>-3</sup> 0.19/-0.14  
Flack parameter 0.03(6)

**Table S3. Fractional Atomic Coordinates ( $\times 10^4$ ) and Equivalent Isotropic Displacement Parameters ( $\text{\AA}^2 \times 10^3$ ) for (–)-1.  $U_{eq}$  is defined as 1/3 of the trace of the orthogonalised  $U_{ij}$  tensor.**

| Atom | x          | y          | z          | U(eq)   |
|------|------------|------------|------------|---------|
| O1   | 3293.2(15) | 5388(2)    | 9525.6(14) | 21.6(3) |
| O2   | 4753.6(13) | 6682.0(19) | 5838.0(13) | 17.7(3) |
| O3   | 2155.6(14) | 1381.6(19) | 4874.6(14) | 18.7(3) |
| O4   | 2868.1(15) | 8760.1(18) | 3133.6(15) | 20.2(3) |
| O5   | 987.2(14)  | 1835.7(18) | 1803.4(14) | 19.5(3) |
| O6   | 4307.1(15) | 1405(2)    | 8259.5(15) | 23.1(3) |
| C1   | 1171(2)    | 4829(3)    | 1146(2)    | 17.7(4) |
| C2   | 1425(2)    | 3534(3)    | 2177.5(19) | 16.2(4) |
| C3   | 2147.6(19) | 4035(3)    | 3571.8(19) | 14.9(4) |
| C4   | 2518.8(19) | 2917(3)    | 4827.7(19) | 14.2(4) |
| C5   | 3414.3(19) | 4018(3)    | 6076.7(18) | 14.8(4) |
| C6   | 2912.9(19) | 3946(3)    | 7337.7(18) | 14.5(4) |
| C7   | 3166(2)    | 2109(3)    | 8011.0(18) | 17.1(4) |
| C8   | 2038(2)    | 1245(3)    | 8419(2)    | 27.5(5) |
| C9   | 3870.7(19) | 5252(3)    | 8444.8(19) | 16.3(4) |
| C10  | 3914(2)    | 7064(3)    | 7744.1(19) | 17.0(4) |
| C11  | 2702(2)    | 7161(3)    | 6310.2(19) | 16.2(4) |
| C12  | 3362.5(19) | 5944(2)    | 5508(2)    | 14.6(4) |
| C13  | 5192(2)    | 7295(3)    | 7293.0(19) | 19.2(4) |
| C14  | 2637.8(19) | 5768(3)    | 3939.6(19) | 14.8(4) |
| C15  | 2409.6(19) | 7031(3)    | 2894(2)    | 16.4(4) |
| C16  | 1666.5(19) | 6543(3)    | 1505(2)    | 17.7(4) |
| C17  | 1283.7(19) | 6514(3)    | 6311(2)    | 18.1(4) |
| C18  | 1383(2)    | 4608(3)    | 6880.2(19) | 15.9(4) |

**Table S4. Anisotropic Displacement Parameters ( $\text{\AA}^2 \times 10^3$ ) for (–)-1. The Anisotropic displacement factor exponent takes the form:  $-2\pi^2[h^2a^{*2}U_{11}+2hka^*b^*U_{12}+\dots]$ .**

| Atom | $U_{11}$ | $U_{22}$ | $U_{33}$ | $U_{23}$ | $U_{13}$ | $U_{12}$ |
|------|----------|----------|----------|----------|----------|----------|
| O1   | 21.8(7)  | 31.7(8)  | 12.5(6)  | -5.5(6)  | 7.5(5)   | -7.0(6)  |
| O2   | 15.5(6)  | 22.6(7)  | 16.3(6)  | -3.5(6)  | 7.3(5)   | -5.3(5)  |
| O3   | 22.3(7)  | 15.3(7)  | 18.4(7)  | 0.0(5)   | 7.3(5)   | 0.3(5)   |
| O4   | 26.4(7)  | 16.0(7)  | 17.8(7)  | 0.8(5)   | 7.5(6)   | -1.5(6)  |
| O5   | 24.0(7)  | 17.2(8)  | 15.5(6)  | -1.1(5)  | 4.7(5)   | -2.5(6)  |

|     |          |          |          |         |          |         |
|-----|----------|----------|----------|---------|----------|---------|
| O6  | 21.6(7)  | 23.3(8)  | 20.8(7)  | 4.0(6)  | 3.2(5)   | 4.4(6)  |
| C1  | 16.0(9)  | 25.0(11) | 12.3(9)  | -0.6(8) | 5.2(7)   | 2.1(8)  |
| C2  | 14.4(9)  | 18.8(10) | 16.5(9)  | -2.0(8) | 7.0(8)   | 0.5(7)  |
| C3  | 14.4(8)  | 16.9(9)  | 14.5(9)  | 0.9(8)  | 6.7(7)   | 0.6(7)  |
| C4  | 13.5(9)  | 16.4(10) | 13.6(9)  | -1.1(7) | 6.1(7)   | 2.6(7)  |
| C5  | 14.1(8)  | 16.6(9)  | 14.1(9)  | 0.6(7)  | 5.6(7)   | 1.8(7)  |
| C6  | 14.4(9)  | 16.7(9)  | 11.9(8)  | -0.2(7) | 4.1(7)   | -0.8(7) |
| C7  | 21.0(10) | 19.4(10) | 10.1(8)  | -0.5(7) | 4.4(7)   | 1.1(8)  |
| C8  | 34.8(11) | 19.5(10) | 36.2(12) | 6.8(9)  | 22.3(10) | 2.7(9)  |
| C9  | 14.7(8)  | 21.6(10) | 12.1(9)  | -1.5(8) | 4.0(7)   | -0.7(8) |
| C10 | 18.1(9)  | 17.8(10) | 15.5(9)  | -3.2(8) | 6.5(7)   | -2.7(8) |
| C11 | 18.1(9)  | 14.8(9)  | 16.2(9)  | -1.2(7) | 7.0(7)   | -0.2(8) |
| C12 | 14.1(9)  | 15.0(9)  | 14.4(9)  | 0.4(7)  | 4.8(7)   | -1.3(7) |
| C13 | 18.8(9)  | 22.2(10) | 17.0(9)  | -5.1(8) | 7.0(8)   | -6.4(8) |
| C14 | 14.1(8)  | 17.5(10) | 14.4(9)  | -1.1(7) | 7.2(7)   | 1.1(7)  |
| C15 | 16.3(9)  | 16.0(9)  | 18.7(9)  | 1.0(8)  | 8.6(7)   | 2.3(8)  |
| C16 | 17.9(8)  | 21.3(10) | 15.8(9)  | 4.7(8)  | 8.4(7)   | 3.9(8)  |
| C17 | 15.8(9)  | 19.8(10) | 19.6(9)  | 1.2(8)  | 7.2(7)   | 2.9(8)  |
| C18 | 14.2(9)  | 18.2(10) | 15.6(9)  | -2.4(8) | 5.4(7)   | -1.7(7) |

**Table S5. Bond Lengths for (-)-1.**

| Atom | Atom | Length/Å | Atom | Atom | Length/Å |
|------|------|----------|------|------|----------|
| O1   | C9   | 1.423(2) | C5   | C12  | 1.557(3) |
| O2   | C12  | 1.444(2) | C6   | C7   | 1.526(3) |
| O2   | C13  | 1.460(2) | C6   | C9   | 1.551(3) |
| O3   | C4   | 1.221(2) | C6   | C18  | 1.540(3) |
| O4   | C15  | 1.377(3) | C7   | C8   | 1.501(3) |
| O5   | C2   | 1.364(2) | C9   | C10  | 1.549(3) |
| O6   | C7   | 1.218(2) | C10  | C11  | 1.540(3) |
| C1   | C2   | 1.388(3) | C10  | C13  | 1.535(3) |
| C1   | C16  | 1.388(3) | C11  | C12  | 1.533(3) |
| C2   | C3   | 1.397(3) | C11  | C17  | 1.523(3) |
| C3   | C4   | 1.463(3) | C12  | C14  | 1.506(3) |
| C3   | C14  | 1.401(3) | C14  | C15  | 1.384(3) |
| C4   | C5   | 1.519(3) | C15  | C16  | 1.393(3) |
| C5   | C6   | 1.541(2) | C17  | C18  | 1.539(3) |

**Table S6. Bond Angles for (-)-1.**

| Atom | Atom | Atom | Angle/°    | Atom | Atom | Atom | Angle/°    |
|------|------|------|------------|------|------|------|------------|
| C12  | O2   | C13  | 106.13(13) | O1   | C9   | C10  | 112.26(16) |
| C16  | C1   | C2   | 120.27(17) | C10  | C9   | C6   | 109.83(15) |

|     |    |     |            |     |     |     |            |
|-----|----|-----|------------|-----|-----|-----|------------|
| O5  | C2 | C1  | 119.67(17) | C11 | C10 | C9  | 109.48(15) |
| O5  | C2 | C3  | 122.57(17) | C13 | C10 | C9  | 113.78(16) |
| C1  | C2 | C3  | 117.75(18) | C13 | C10 | C11 | 100.89(15) |
| C2  | C3 | C4  | 127.54(18) | C12 | C11 | C10 | 96.96(15)  |
| C2  | C3 | C14 | 122.13(17) | C17 | C11 | C10 | 115.03(15) |
| C14 | C3 | C4  | 110.32(16) | C17 | C11 | C12 | 113.79(16) |
| O3  | C4 | C3  | 126.33(18) | O2  | C12 | C5  | 111.85(15) |
| O3  | C4 | C5  | 125.79(17) | O2  | C12 | C11 | 102.96(14) |
| C3  | C4 | C5  | 107.87(16) | O2  | C12 | C14 | 110.47(14) |
| C4  | C5 | C6  | 113.53(15) | C11 | C12 | C5  | 108.89(15) |
| C4  | C5 | C12 | 105.54(15) | C14 | C12 | C5  | 104.50(15) |
| C6  | C5 | C12 | 111.39(15) | C14 | C12 | C11 | 118.34(15) |
| C5  | C6 | C9  | 105.88(15) | O2  | C13 | C10 | 106.36(14) |
| C7  | C6 | C5  | 110.64(15) | C3  | C14 | C12 | 111.01(16) |
| C7  | C6 | C9  | 106.75(14) | C15 | C14 | C3  | 119.35(17) |
| C7  | C6 | C18 | 114.90(16) | C15 | C14 | C12 | 129.65(17) |
| C18 | C6 | C5  | 109.60(14) | O4  | C15 | C14 | 124.18(17) |
| C18 | C6 | C9  | 108.64(15) | O4  | C15 | C16 | 117.18(17) |
| O6  | C7 | C6  | 119.03(18) | C14 | C15 | C16 | 118.64(18) |
| O6  | C7 | C8  | 121.26(19) | C1  | C16 | C15 | 121.83(18) |
| C8  | C7 | C6  | 119.64(17) | C11 | C17 | C18 | 111.33(15) |
| O1  | C9 | C6  | 106.35(15) | C17 | C18 | C6  | 109.89(15) |

**Table S7. Torsion Angles for (-)-1.**

| A  | B   | C   | D   | Angle/°     | A   | B   | C   | D   | Angle/°     |
|----|-----|-----|-----|-------------|-----|-----|-----|-----|-------------|
| O1 | C9  | C10 | C11 | -102.62(17) | C7  | C6  | C9  | C10 | 168.15(15)  |
| O1 | C9  | C10 | C13 | 145.36(16)  | C7  | C6  | C18 | C17 | 176.23(15)  |
| O2 | C12 | C14 | C3  | 126.65(16)  | C9  | C6  | C7  | O6  | -67.6(2)    |
| O2 | C12 | C14 | C15 | -53.7(2)    | C9  | C6  | C7  | C8  | 109.4(2)    |
| O3 | C4  | C5  | C6  | -48.4(2)    | C9  | C6  | C18 | C17 | 56.77(19)   |
| O3 | C4  | C5  | C12 | -170.68(18) | C9  | C10 | C11 | C12 | -75.51(17)  |
| O4 | C15 | C16 | C1  | 179.26(17)  | C9  | C10 | C11 | C17 | 44.9(2)     |
| O5 | C2  | C3  | C4  | -1.8(3)     | C9  | C10 | C13 | O2  | 91.64(18)   |
| O5 | C2  | C3  | C14 | 177.59(17)  | C10 | C11 | C12 | O2  | -50.40(16)  |
| C1 | C2  | C3  | C4  | 179.28(17)  | C10 | C11 | C12 | C5  | 68.44(18)   |
| C1 | C2  | C3  | C14 | -1.4(3)     | C10 | C11 | C12 | C14 | -172.53(16) |
| C2 | C1  | C16 | C15 | -0.8(3)     | C10 | C11 | C17 | C18 | -55.5(2)    |
| C2 | C3  | C4  | O3  | -6.3(3)     | C11 | C10 | C13 | O2  | -25.5(2)    |
| C2 | C3  | C4  | C5  | 174.87(18)  | C11 | C12 | C14 | C3  | -115.10(19) |
| C2 | C3  | C14 | C12 | 179.36(16)  | C11 | C12 | C14 | C15 | 64.6(3)     |
| C2 | C3  | C14 | C15 | -0.3(3)     | C11 | C17 | C18 | C6  | 2.3(2)      |
| C3 | C4  | C5  | C6  | 130.39(16)  | C12 | O2  | C13 | C10 | -6.2(2)     |
| C3 | C4  | C5  | C12 | 8.12(18)    | C12 | C5  | C6  | C7  | -171.93(15) |

|                |             |                 |             |
|----------------|-------------|-----------------|-------------|
| C3 C14 C15 O4  | -178.71(16) | C12 C5 C6 C9    | -56.63(19)  |
| C3 C14 C15 C16 | 1.5(3)      | C12 C5 C6 C18   | 60.36(19)   |
| C4 C3 C14 C12  | -1.2(2)     | C12 C11 C17 C18 | 55.1(2)     |
| C4 C3 C14 C15  | 179.10(16)  | C12 C14 C15 O4  | 1.7(3)      |
| C4 C5 C6 C7    | 69.1(2)     | C12 C14 C15 C16 | -178.15(17) |
| C4 C5 C6 C9    | -175.61(16) | C13 O2 C12 C5   | -80.80(18)  |
| C4 C5 C6 C18   | -58.6(2)    | C13 O2 C12 C11  | 35.96(18)   |
| C4 C5 C12 O2   | -128.05(15) | C13 O2 C12 C14  | 163.24(15)  |
| C4 C5 C12 C11  | 118.83(15)  | C13 C10 C11 C12 | 44.72(18)   |
| C4 C5 C12 C14  | -8.52(18)   | C13 C10 C11 C17 | 165.09(16)  |
| C5 C6 C7 O6    | 47.2(2)     | C14 C3 C4 O3    | 174.25(18)  |
| C5 C6 C7 C8    | -135.84(17) | C14 C3 C4 C5    | -4.5(2)     |
| C5 C6 C9 O1    | 171.93(15)  | C14 C15 C16 C1  | -0.9(3)     |
| C5 C6 C9 C10   | 50.23(19)   | C16 C1 C2 O5    | -177.06(17) |
| C5 C6 C18 C17  | -58.48(19)  | C16 C1 C2 C3    | 1.9(3)      |
| C5 C12 C14 C3  | 6.2(2)      | C17 C11 C12 O2  | -171.71(15) |
| C5 C12 C14 C15 | -174.15(19) | C17 C11 C12 C5  | -52.9(2)    |
| C6 C5 C12 O2   | 108.31(17)  | C17 C11 C12 C14 | 66.2(2)     |
| C6 C5 C12 C11  | -4.8(2)     | C18 C6 C7 O6    | 171.92(16)  |
| C6 C5 C12 C14  | -132.16(15) | C18 C6 C7 C8    | -11.1(2)    |
| C6 C9 C10 C11  | 15.5(2)     | C18 C6 C9 O1    | 54.29(19)   |
| C6 C9 C10 C13  | -96.54(18)  | C18 C6 C9 C10   | -67.41(19)  |
| C7 C6 C9 O1    | -70.14(18)  |                 |             |

**Table S8. Hydrogen Atom Coordinates ( $\text{\AA} \times 10^4$ ) and Isotropic Displacement Parameters ( $\text{\AA}^2 \times 10^3$ ) for (-)-1.**

| Atom | x       | y       | z        | U(eq) |
|------|---------|---------|----------|-------|
| H1   | 3901.91 | 5803.03 | 10256.15 | 32    |
| H4   | 3351.11 | 8893.63 | 3990.01  | 30    |
| H5   | 1344.88 | 1161.11 | 2496.64  | 29    |
| H1A  | 657.09  | 4540.76 | 191.42   | 21    |
| H5A  | 4406.65 | 3581.38 | 6387.31  | 18    |
| H8A  | 2346.84 | 57.36   | 8792.79  | 41    |
| H8B  | 1174.09 | 1152.58 | 7590.83  | 41    |
| H8C  | 1857.83 | 1962.39 | 9140.76  | 41    |
| H9   | 4844.18 | 4754.3  | 8846.12  | 20    |
| H10  | 3852.15 | 8062.96 | 8366.6   | 20    |
| H11  | 2613.57 | 8394.21 | 5926.26  | 19    |
| H13A | 5479.41 | 8556.01 | 7359.7   | 23    |
| H13B | 5995.44 | 6583.15 | 7903     | 23    |
| H16  | 1494.04 | 7408.17 | 783.82   | 21    |
| H17A | 586.78  | 6554.8  | 5340.35  | 22    |
| H17B | 953.25  | 7313.94 | 6901.25  | 22    |

|      |         |         |         |    |
|------|---------|---------|---------|----|
| H18A | 762.66  | 3818.96 | 6140.76 | 19 |
| H18B | 1064.22 | 4580.17 | 7693.17 | 19 |

## Biological Assays

### Biological Assays of Compounds (+)-1 and (–)-1

#### 1. Expression and purification of human recombinant COX-1 and COX-2 in *Escherichia coli*

Human COX-1/COX-2 protein-encoding sequence (without signal peptide) were subcloned into the pET-30a constructs. All COX-2 mutants (Y385A, S530A) were generated by site-directed mutagenesis and confirmed by sequencing. The wild type and mutant recombinant proteins were purified with Ni-ATA column after IPTG induction at 18°C for 24 hours.

#### 2. In vitro cyclooxygenase (COX) inhibitory assay

Compounds were evaluated for COX inhibitory activity in vitro by using Cayman's COX Fluorescent Inhibitor Screening Assay Kit (Cayman hemical Company, Ann Arbor, MI, USA). Human recombinant COX-1/COX-2 enzyme were pre-incubated with serially diluted test compounds for 15 min at room temperature, heme and fluorometric substrate were added and incubated for another 15 min at room temperature. The reaction was started by the addition of arachidonic acid and allowed to proceed for 2 min. The intensity of fluorescence was measured using a 530 nm excitation wavelength and a 595 nm emission wavelength using a micro plate reader (BioTek). The data were analyzed using GraphPad Prism5 (GraphPad Software Inc.). All the tests were performed in triplicate.

#### 3. IC<sub>50</sub> evaluation based on the non-linear regression

We developed the IC<sub>50</sub> assay strictly following the user's manual of the Graphpad Prism software package (Mountain View, CA), which has been chosen as the protocol for IC<sub>50</sub> evaluation by numerous published studies. Briefly, the compounds were serial diluted and added to the reaction mixture for incubation. The corresponding enzyme activity were recorded and normalized as the percentage of the full enzyme activity of COX-1/COX-2. Afterwards, the dose-response curve were generated based

on the nonlinear regression fitting of log-transformed data of serial diluted concentration value (X axis value) and the normalized enzyme activity data (Y axis value). During this procedure, the standard equation “log(inhibitor) vs. response -- Variable slope (four parameters)”, a built-in module of the GraphPad Prism5 software Package (Mountain View, CA) was employed to made the curve fitting and IC<sub>50</sub> calculation. All the tests were performed in triplicate.

#### **4. Statistics**

Data are expressed as means  $\pm$  standard error of the mean (SEM) of the indicated independent experiments. Statistical analyses were performed by Student's t-test or One-Way Analysis of Variance (ANOVA) by a post-hoc test. \*  $p < 0.05$  was considered significant.

#### **Docking study**

For ligand preparation, compounds (+)-**1** and (–)-**1** were drawn and converted to PDB format by CORINA online service (<http://www.molecular-networks.com/online-demos/corinademo/>). The PDB format of ligand was then converted to PDBQT format by AutoDock Tools 1.5.6 (The Scripps Research Institute, CA, USA). For receptor preparation, 5IKQ human COX-2 models was downloaded from Protein Data Bank. Both ligands and water molecules in 5IKQ were removed by Chimera 1.7mac (UCSF Resource for Biocomputing, Visualization, and Informatics, CA, USA). The modified 5IKQ was converted to PDBQT format by AutoDock Tools 1.5.6 (The Scripps Research Institute, CA, USA) with minor modifications.

The software AutoDock Vina v.1.0.2 (downloadable at <http://vina.scripps.edu/>) developed in the Molecular Graphics Lab at The Scripps Research Institute (Trott & Olson, 2010) was used for all dockings in this study. The docking parameters for AutoDock Vina were kept to their default values. The grid box was 20 Å  $\times$  20 Å  $\times$  18 Å, encompassing the catalytic cavity of COX-2. The binding modes were clustered through the root-mean square deviation (RMSD) among the Cartesian coordinates of the ligand atoms. The binding modes with lowest binding free energy and the most cluster members were chosen for the optimum docking conformation. The binding mode were illustrated by PyMOL Molecular Graphics System Version 1.3 (Schrödinger, LLC).

To validate our docking model, we extracted the inhibitors from the original protein model. Our docking simulation showed that the predicted conformations of the inhibitor is close to the experimental conformations of the inhibitor. Furthermore, the inhibitor exhibited a high binding score ( $-8.6$  kcal/mol) against human COX-2 (Figure S21).
